# Supplementary material
Source: Springer Nature journal article supplement (https://www.springermedizin.de/resource/supplementary/12916_2013_1079_MOESM1_ESM.pdf/9598842)
Supplement: MOESM1 [file 9598842]

5,656 patients with clinical features of PE from all the medical disciplines

Out of which

151 (2.67%) from the discipline of trauma and orthopedics

CTPA

650 (11.5%) patients with positive findings of PE

86 patients from the discipline of trauma and orthopedics

85 patients forming the study group (1 patient excluded—PE event prior the hospital admission)
